# Supplementary material for: A Systematic Review of the Most Recent Concepts in Smart Windows Technologies with a Focus on Electrochromics
Source: MDPI journal article supplement (doi:10.3390/su13179604), 2021-08-26
Supplement: s1 [file s1]

## PRISMA 2020 flow diagram for new systematic reviews which included searches of databases and registers only

for the paper titled "A systematic review of the most recent concepts in smart windows technologies with a focus on electrochromics."

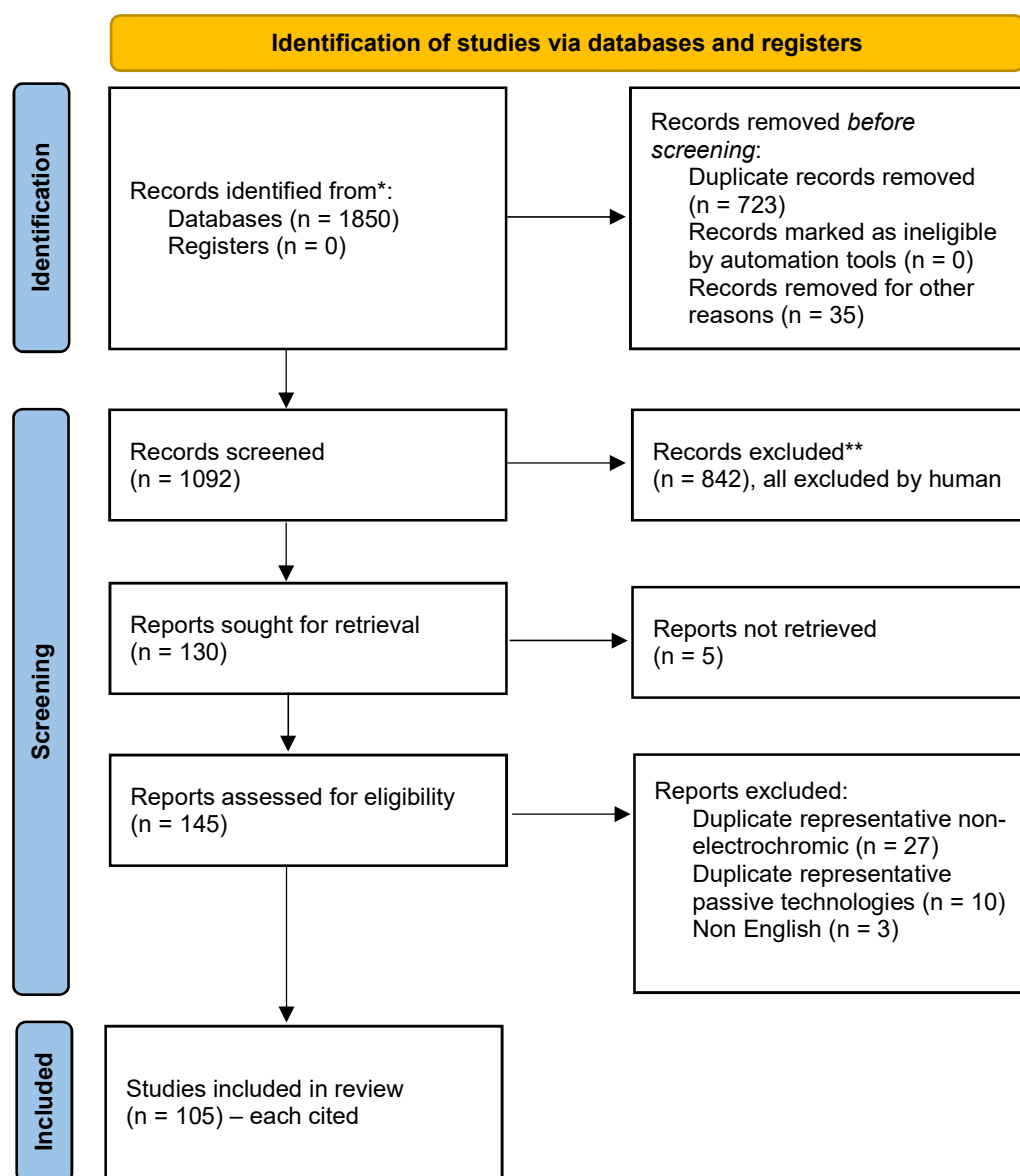

\*Consider, if feasible to do so, reporting the number of records identified from each database or register searched (rather than the total number across all databases/registers).

\*\*If automation tools were used, indicate how many records were excluded by a human and how many were excluded by automation tools.

From: Page MJ, McKenzie JE, Bossuyt PM, Boutron I, Hoffmann TC, Mulrow CD, et al. The PRISMA 2020 statement: an updated guideline for reporting systematic reviews. BMJ 2021;372:n71. doi: 10.1136/bmj.n71

For more information, visit: <http://www.prisma-statement.org/>
